# Supplementary material for: A household survey of medicine storage practices in Gondar town, northwestern Ethiopia
Source: Springer Nature journal article supplement (doi:10.1186/s12889-017-4152-8), 2017-03-09
Supplement: MOESM1 [file 12129198]

**University of Gondar,**

**College of Medicine and Health Sciences, School of Pharmacy**

**A data collection instrument for household survey of medicine storage practices in Gondar Town, northwestern Ethiopia**

**Consent Form**

Dear sir/madam my name is \_\_\_\_\_. I am from the School of Pharmacy at University of Gondar working with a research team to assess the household medication storage and utilization in Gondar Town.

This interview and observation is part of the research and the information you provide will be a very important input in the understanding of the topic at hand and will help implement various activities which will base on the finding to correct problems, if any, regarding medication use and storage practices in the town.

The interview and observation will only take 10 to 15 minutes and you have a right to not answer any question that you don't want to respond to. You can also stop the interview if you want to do so. All the information from this interview will be kept confidential and used only for the study. The data will be kept using codes and analyzed anonymously in aggregate, not individually. If you have any questions about this study you can ask at any point in the interview or can call Fitsum Sebsibe Teni at 0911333607.

Are you willing to participate in this study?    Yes    ☐    No    ☐

Respondent's code \_\_\_\_\_    Date \_\_\_\_\_    Data collector's no. \_\_\_\_\_

**1. Socio-demographic profile and health**

1.1. Kebele/sub-city \_\_\_\_\_    1.2. Age \_\_\_\_\_    1.3. Sex:    male ☐    female ☐

1.4. Religion:

Orthodox Christianity ☐    Islam ☐    Protestantism ☐    Other, specify \_\_\_\_\_

1.5. Level of education:

Not able to read and write ☐    Able to read and write ☐    Primary school ☐

Secondary school ☐    College/university ☐

1.6. Ethnicity: Amhara ☐ Tigre ☐ Other, specify \_\_\_\_\_

1.7. Occupation \_\_\_\_\_

1.8. Educational level of family members: What is the highest level of education achieved by a member of the family currently living with you?

Not able to read and write ☐ Able to read and write ☐ Primary school ☐

Secondary school ☐ College/university ☐

1.9. How much is your estimate of the total family income per month (in ETB)?

\_\_\_\_\_

1.10. Is there anyone in the family in the health related profession? Yes ☐ No ☐

1.11. Is there anyone in the family suffering from long term/chronic conditions? (e.g. hypertension, diabetes)

Yes ☐ No ☐

If yes, please specify the condition \_\_\_\_\_

## 2. Current medicine use and storage

2.1. Do you currently keep medicines at home?

Yes ☐ No ☐

2.2. If yes, are you willing to show it/them to me?

Yes ☐ No ☐

| Medicine number | 2.3. Medication name, strength, dosage form | 2.4. Current status of medicine<br>"√" |                |                     |             | 2.5. Purpose of use (illness) |
|-----------------|---------------------------------------------|----------------------------------------|----------------|---------------------|-------------|-------------------------------|
|                 |                                             | On use                                 |                | Kept for future use | Not for use |                               |
|                 |                                             | Original /first user                   | Another person |                     |             |                               |
|                 |                                             |                                        |                |                     |             |                               |
|                 |                                             |                                        |                |                     |             |                               |
|                 |                                             |                                        |                |                     |             |                               |
|                 |                                             |                                        |                |                     |             |                               |
|                 |                                             |                                        |                |                     |             |                               |
|                 |                                             |                                        |                |                     |             |                               |
|                 |                                             |                                        |                |                     |             |                               |
|                 |                                             |                                        |                |                     |             |                               |
|                 |                                             |                                        |                |                     |             |                               |
|                 |                                             |                                        |                |                     |             |                               |
|                 |                                             |                                        |                |                     |             |                               |
|                 |                                             |                                        |                |                     |             |                               |

| Medicine number | 2.6. Who advised to get the medicine? | 2.7. How was it acquired? "√" |                      | 2.8. From where? (Source) | 2.9. When/How long has it been? | 2.10. Why was this source chosen? |
|-----------------|---------------------------------------|-------------------------------|----------------------|---------------------------|---------------------------------|-----------------------------------|
|                 |                                       | With Prescription             | Without prescription |                           |                                 |                                   |
|                 |                                       |                               |                      |                           |                                 |                                   |
|                 |                                       |                               |                      |                           |                                 |                                   |
|                 |                                       |                               |                      |                           |                                 |                                   |
|                 |                                       |                               |                      |                           |                                 |                                   |
|                 |                                       |                               |                      |                           |                                 |                                   |
|                 |                                       |                               |                      |                           |                                 |                                   |
|                 |                                       |                               |                      |                           |                                 |                                   |
|                 |                                       |                               |                      |                           |                                 |                                   |
|                 |                                       |                               |                      |                           |                                 |                                   |
|                 |                                       |                               |                      |                           |                                 |                                   |
|                 |                                       |                               |                      |                           |                                 |                                   |

| Medicine<br>number | 2.11. Type of package |       | 2.12. Packaging<br>material * | 2.13. Expiry date "√" |             |                 | 2.14. Storage place |
|--------------------|-----------------------|-------|-------------------------------|-----------------------|-------------|-----------------|---------------------|
|                    | Original              | Other |                               | Recorded              |             | Not<br>recorded |                     |
|                    |                       |       |                               | Expired               | Not expired |                 |                     |
|                    |                       |       |                               |                       |             |                 |                     |
|                    |                       |       |                               |                       |             |                 |                     |
|                    |                       |       |                               |                       |             |                 |                     |
|                    |                       |       |                               |                       |             |                 |                     |
|                    |                       |       |                               |                       |             |                 |                     |
|                    |                       |       |                               |                       |             |                 |                     |
|                    |                       |       |                               |                       |             |                 |                     |
|                    |                       |       |                               |                       |             |                 |                     |
|                    |                       |       |                               |                       |             |                 |                     |
|                    |                       |       |                               |                       |             |                 |                     |
|                    |                       |       |                               |                       |             |                 |                     |
|                    |                       |       |                               |                       |             |                 |                     |
|                    |                       |       |                               |                       |             |                 |                     |

\*Type of package: A: Plastic bag , B: Paper bag C: Blister pack D: Strip pack E: Bottle F: Vial G: Other (specify)

Thank you!
